# Supplementary material for: The end of the African humid period as seen by a transient comprehensive Earth system model simulation of the last 8000 years
Source: Copernicus journal article supplement (doi:10.5194/cp-16-117-2020), 2020-01-15
Supplement: Supplementary file 2 [file cp-16-117-2020-supplement.zip]

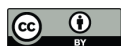

## *Supplement of*

# **The end of the African humid period as seen by a transient comprehensive Earth system model simulation of the last 8000 years**

**Anne Dallmeyer et al.**

*Correspondence to:* Anne Dallmeyer ([anne.dallmeyer@mpimet.mpg.de](mailto:anne.dallmeyer@mpimet.mpg.de))

- [cp-16-117-2020-supplement-title-page.pdf](#)
- [AHPproxies.xls](#)
- [AHPproxies\\_README.txt](#)
- [map\\_transient\\_vegetation\\_change.pdf](#)

The copyright of individual parts of the supplement might differ from the CC BY 4.0 License.
