# Supplementary material for: The end of the African humid period as seen by a transient comprehensive Earth system model simulation of the last 8000 years
Source: Copernicus journal article supplement (doi:10.5194/cp-16-117-2020), 2020-01-15
Supplement: Supplementary file 3 [file cp-16-117-2020-supplement.zip]

Archive with 4 entries (4 files):
- map_transient_vegetation_change.pdf
- AHPproxies_README.txt
- cp-16-117-2020-supplement-title-page.pdf
- AHPproxies.xls
