# Supplementary material for: The end of the African humid period as seen by a transient comprehensive Earth system model simulation of the last 8000 years
Source: Copernicus journal article supplement (doi:10.5194/cp-16-117-2020), 2020-01-15
Supplement: Supplementary file 3 [file cp-16-117-2020-supplement.zip › AHPproxies.xls]

## Sheet: proxies
Site	Location	Core	Lat	Lon	archive	proxy	end	rounded	reference			date change
1	Agaean Sea	SL143	38.2617	25.1032	marine	XRF-Fe, clays	7.5	-7500	Ehrmann, W., M. Seidel, and G. Schmiedl (2013), Dynamics of Late Quaternary North African humid periods documented in the clay mineral record of central Aegean Sea sediments, Global and Planetary Change, 107(0), 186 – 195, doi:http://dx.doi.org/10.1016/j.gloplacha.2013.05. 010.			No
2	Med	MD04-2797	36.95	11.6667	marine	pollen	7.3	-7000	Desprat, S. et al. Deglacial and Holocene vegetation and climatic changes in the southern Central Mediterranean from a direct land–sea correlation. Climate of the Past 9, 767–787 (2013).			No
3	Med	MD95-2043	36.15	-2.61667	marine	pollen	7.73	-7500	Fletcher, W. J., Debret, M. & Sanchez Goñi, M. F. Mid-Holocene emergence of a low-frequency millennial oscillation in western Mediterranean climate: Implications for past dynamics of the North Atlantic atmospheric westerlies. The Holocene 23, 153–166			No
4	Morocco	Bab el karn	35.0217	-5.20667	lake	grain size	8	-8000	Cheddadi, R., Bouaissa, O., Rhoujjati, A., & Dezileau, L. (2016). Environmental changes in the moroccan western Rif mountains over the last 9,000 years. Quaternaire. Revue de l'Association française pour l'étude du Quaternaire, 27(1), 15-25.			No
5	Lebanon	Jeita Cave	33.95	35.65	cave	d18O	8	-8000	Cheng H, Sinha A, Verheyden S, Nader FH, Li XL, Zhang PZ, Yin JJ, Yi L, Peng YB, Rao ZG, Ning YF. The climate variability in northern Levant over the past 20,000 years. Geophysical Research Letters. 2015 Oct 28;42(20):8641-50.			No
6	Morocco	Tigalmamine	33.84	-4.09	lake	pollen	0	0	Lamb HF, Eicher U, Switsur VR. An 18,000-year record of vegetation, lake-level and climatic change from Tigalmamine, Middle Atlas, Morocco. Journal of biogeography. 1989 Jan 1:65-74.			No
7	Tunisia	Sebkha Boujmel	33.2667	11.0833	lake	pollen, mineral	6.5	-6500	S. Jaouadi, Vincent Lebreton, Viviane Bout-Roumazeilles, G. Siani, R. Lakhdar, et al.. Environmental changes, climate and anthropogenic impact in southern-eastern Tunisia during the last 8 kyr . Climate of the Past, , 2016, 12 (6), pp.1339-1359.			No
8	Morocco	Sidi Ali	33.05	5	lake	TOC	7.25	-7000	Zielhofer C, Fletcher WJ, Mischke S, De Batist M, Campbell JF, Joannin S, Tjallingii R, El Hamouti N, Junginger A, Stele A, Bussmann J. Atlantic forcing of Western Mediterranean winter rain minima during the last 12,000 years. Quaternary Science Reviews. 2017 Feb 1;157:29-51.			No
9	Levantine Basin	SL112	32.74	34.65	marine	Ba/Ca G. ruber	7.8	-7500	Weldeab, S., V. Menke, and G. Schmiedl (2014), The pace of East African monsoon evolution during the Holocene, Geophys.Res. Lett., 41, 1724–1731, doi:10.1002/2014GL059361.			No
10	Morocco	Ait Ichou	32.6833	-5.55	lake	gs/pollen	7	-7000	Tabel J, Khater C, Rhoujjati A, Dezileau L, Bouimetarhan I, Carre M, Vidal L, Benkaddour A, Nourelbait M, Cheddadi R. Environmental changes over the past 25 000 years in the southern Middle Atlas, Morocco. Journal of Quaternary Science. 2016 Feb;31(2):93-102.			No
11	Algeria	Sebkha mellala	32.18	5.2	lake	d18O, stratigraphy	8.35	-8000	Hoelzmann, P. et al. in Past climate variability through Europe and Africa 219-256 (Springer, 2004); Gasse, F., Téhet, R., Durand, A., Gibert, E., Fontes, J.C. The arid-humid transition in the Sahara and the Sahel during the last deglaciation. Nature 345, 141-146 (1990); Gasse, F. Diatom-inferred salinity and carbonate oxygen isotopes in Holocene waterbodies of the western Sahara and Sahel (Afric…			reeval to indicate initial drop from highstand (second drop is at 5.6 kyr is deflation)
12	E Med	MD9509	32.0333	34.2833	marine	XRF	8.08	-8000	Hoelzmann, P. et al. in Past climate variability through Europe and Africa 219-256 (Springer, 2004); Gasse, F., Téhet, R., Durand, A., Gibert, E., Fontes, J.C. The arid-humid transition in the Sahara and the Sahel during the last deglaciation. Nature 345, 141-146 (1990); Gasse, F. Diatom-inferred salinity and carbonate oxygen isotopes in Holocene waterbodies of the western Sahara and Sahel (Afric…			No
13	Med	MS27PT	31.7983	29.4617	marine	elemental	8.01	-8000	Bastian L, Revel M, Bayon G, Dufour A, Vigier N. Abrupt response of chemical weathering to Late Quaternary hydroclimate changes in northeast Africa. Scientific reports. 2017 Mar 14;7:44231.			No
14	Nile	P362-2	31.68	29.75	marine	Ti/Ca	7.4	-7000	Blanchet, C. L., R. Tjallingii, M. Frank, J. Lorenzen, A. Reitz, K. Brown, T. Feseker, and W. Bru¨ckmann (2013), High-and low-latitude forcing of the Nile River regime during the Holocene inferred from laminated sediments of the Nile deep-sea fan, Earth and Planetary Science Letters, 364, 98–110.			No
15	Algeria	Hassi el Mejnah	31.67	2.5	lake	d18O, stratigraphy, biological	7.7	-7500	Hoelzmann, P. et al. in Past climate variability through Europe and Africa 219-256 (Springer, 2004); Gasse, F. Diatom-inferred salinity and carbonate oxygen isotopes in Holocene waterbodies of the western Sahara and Sahel (Africa). Quaternary Science Reviews 21, 737-767 (2002); Fontes, J. C. et al. Freshwater to marine-like environments from Holocene lakes in northern Sahara. Nature 317, 608-610,…			reeval to indicate initial drop from highstand (second drop is at 4.5 kyr is deflation)
16	Sinai, Israel	Geo B7702-3,	31.65	34.07	marine	d13C	7	-7000	Castañeda IS, Schouten S, Pätzold J, Lucassen F, Kasemann S, Kuhlmann H, Schefuß E. Hydroclimate variability in the Nile River Basin during the past 28,000 years. Earth and Planetary Science Letters. 2016 Mar 15;438:47-56.			No
17	Israel	Soreq Cave	31.45	35.03	cave	d18O	7.2	-7000	Bar-Matthews M, Ayalon A. Mid-Holocene climate variations revealed by high-resolution speleothem records from Soreq Cave, Israel and their correlation with cultural changes. The Holocene. 2011 Feb;21(1):163-71.			No
18	Atlantic	GC27	30.88	-10.63	marine	dDwax	6.9	-6500	Tierney JE, Pausata FS. Rainfall regimes of the Green Sahara. Science advances. 2017 Jan 1;3(1):e1601503.			No
19	Atlantic	GeoB5546	27.54	-13.74	marine	XRF	0	0	Kuhlmann, H., Meggers, H., Freudenthal, T. & Wefer, G. The transition of the monsoonal and the N Atlantic climate system off NW Africa during the Holocene. Geophysical Research Letters 31, L22204, doi:10.1029/2004GL021267 (2004).			Record very noisy but very little if any change - reevaluation by TMS
20	Egypt	Farafra	27.1	28.1	lake	stratigraphy	6.9	-6500	Donner, J. The geology of a playa in Farafra, Western Desert of Egypt. Palaeoecology of Africa 25, 121-131 (1998); Donner, J. J., Ashour, M.M., Embabi, N.S., Siiriäinen, A. The Quaternary geology of a playa in Farafra, Western Desert of Egypt. Annales Academiae Scientiarum Fennicae. Geologica-Geographica 160, 49-112 (1999); Hassan, F. A., Barich, B., Mahmoud, M., Hemdan, M.A. Holocene playa depos…			No
21	Atlantic	GC37	26.816	-15.118	marine	dDwax	6.7	-6500	Tierney JE, Pausata FS. Rainfall regimes of the Green Sahara. Science advances. 2017 Jan 1;3(1):e1601503.	now using dD		now using dD
22	Egypt	Gebel Umm Hammad	26.25	34	cave	stratifraphy	8.1	-8000	Moeyersons, J., Vermeersch, P.M., Beeckman, H., et al., 1999. Holocene environmental changes in the Gebel Umm Hammad, Eastern Desert, Egypt. Geomorphology, 26: 197-312.			No
23	Libya	erg Uan Kasa	25.76	10.89	lake	stratigraphy, diatom	5.2	-5000	Cremaschi, M., di Lernia, S. Holocene climatic changes and cultural dynamics in the Libyan Sahara. African Archaeological Review 16, 211-243 (1999); Cremaschi, M., Zerboni, A. Early to middle holocene landscape exploitation in a drying environment: two case studies compared from the central Sahara (SW Fezzan, Libya). Comptes Rendus Geoscience 341, 689-702 (2009)			No
24	Libya	Tadrart Acacus	25.5	10.5	lake	stratigraphy	8.1	-8000	Cremaschi, M., Zerboni, A. Early to middle holocene landscape exploitation in a drying environment: two case studies compared from the central Sahara (SW Fezzan, Libya). Comptes Rendus Geoscience 341, 689-702 (2009)			No
25	Egypt	Wadi Bakht	23.217	26.433	lake	stratigraphy	7.4	-7000	Linstädter, J., and S. Kröpelin (2004), Wadi Bakht revisited: Holocene climate change and prehistoric occupation in the Gilf Kebir region of the Eastern Sahara, SW Egypt, Geoarchaeology, 19(8), 753–778.			No
26	Atlantic	GC49	23.206	-17.854	marine	dDwax	6.6	-6500	Tierney JE, Pausata FS. Rainfall regimes of the Green Sahara. Science advances. 2017 Jan 1;3(1):e1601503.			now using dD
27	Arabian Sea	SO130-289KL	23.12	66.497	marine_sediment	stratigraphy	5.6	-5500	Deplazes, G., A. Lückge, J.-B. Stuut, J. Pätzold, H. Kuhlmann, D. Husson, M. Fant, and G. Haug (2014), Weakening and strengthening of the Indian monsoon during Heinrich events and Dansgaard-Oeschger oscillations, Paleoceanography, 29(2), 99–114, doi:10.1002/2013PA002509.			No
28	Oman	Hoti	23.0833	57.35	cave	d18O	7.5	-7500	Fleitmann, D., S. J. Burns, A. Mangini, M. Mudelsee, J. Kramers, I. Villa, U. Neff, A. A. Al-Subbary, A. Buettner, D. Hippler, et al. (2007), Holocene ITCZ and Indian monsoon dynamics recorded in stalagmites from Oman and Yemen (Socotra), Quaternary Science Reviews, 26(1), 170–188.			No
29	Mali	Agorgott	22.65	-4.02	lake	stratigraphy	6.3	-6000	Hoelzmann, P. et al. in Past climate variability through Europe and Africa 219-256 (Springer, 2004); Delibrias, G., Petit-Maire, N. & Fabre, J. Ages des dépôts lacustres récents de la région de Taoudenni-Trhaza (Sahara malien). Comptes Rendus de l'Académie des Sciences, Paris 299, 1343-1346 (1984); Fabre, J. & Petit-Maire, N. Holocene climatic evolution at 22–23 N from two palaeolakes in the Taou…			No
30	Mali	Wadi Haijad	22.57	-3.67	lake	d18O, stratigraphy, biological	7.15	-7000	Hoelzmann, P. et al. in Past climate variability through Europe and Africa 219-256 (Springer, 2004); Gasse, F. Diatom-inferred salinity and carbonate oxygen isotopes in Holocene waterbodies of the western Sahara and Sahel (Africa). Quaternary Science Reviews 21, 737-767 (2002); Hillaire-Marcel, C., Riser, J., Rognon, P., Petit-Maire, N., Rosso, J.C., Soulie-Marche, I. Radiocarbon chronology of Ho…			reeval to indicate initial drop from highstand (second drop is at 5 kyr is DEFLATION)
31	Mauritania	Erg Akchar	21.98	-13.32	lake	stratigraphy	3.3	-3000	Hoelzmann, P. et al. in Past climate variability through Europe and Africa 219-256 (Springer, 2004); Deynoux, M. et al. Stratigraphie séquentielle en milieu désertique. Exemple de l'erg Akchar en Mauritanie occidentale. Comptes Rendus Académie des Sciences, Paris II 317, 1199-1205 (1993); Kocurek, G., Havholm, K. G., Deynoux, M. & Blakey, R. C. Amalgamated accumulations resulting from climatic an…			No
32	Sudan	Dry Selima	21.37	29.17	lake	stratigraphy	6.5	-6500	Abell, P.I. and Hoelzmann, P., 2000. Holocene palaeoclimates in northwestern Sudan: stable isotope studies on molluscs. Global and Planetary Change, 26: 1-12.			No
33	Mali	Tagnout-Chaggaret	21.22	-0.68	lake	stratigraphy	6.5	-6500	Hoelzmann, P. et al. in Past climate variability through Europe and Africa 219-256 (Springer, 2004); Riser, J., Rognon, P., Petit-Maire, N., Rosso, J.C., Soulie-Marche, I. Radiocarbon chronology of Holocene hydrologic changes in northeastern Mali. Quaternary Research 20, 145-164 (1983).			reeval to indicate initial drop from highstand (second drop is at 5 kyr is DEFLATION)
34	Mauritania	Chemchane	20.93	-12.22	lake	geochemistry	6.4	-6000	Hoelzmann, P. et al. in Past climate variability through Europe and Africa 219-256 (Springer, 2004); Lézine, A.-M. Paléoenvironnements végétaux d'Afrique nord tropicale depuis 12000 BP, University Aix-Marseille, (1987); Lézine, A.-M. & Casanova, J. Pollen and hydrological evidence for the interpretation of past climates in tropical West Africa during the Holocene. Quaternary Science Reviews 8, 45…			No
35	Sundan	Selima Oasis	20.92	27.68	lake	pollen	5.6	-5500	Haynes Jr CV, Eyles CH, Pavlish LA, Ritchie JC, Rybak M. Holocene palaeoecology of the eastern Sahara; Selima Oasis. Quaternary Science Reviews. 1989 Jan 1;8(2):109-36.			No
36	Atlantic	GeoB7920	20.7515	-18.5817	marine	grain size	5.4	-5000	Tjallingii R, Claussen M, Stuut JB, Fohlmeister J, Jahn A, Bickert T, Lamy F, Röhl U. Coherent high-and low-latitude control of the northwest African hydrological balance. Nature Geoscience. 2008 Oct;1(10):670. 2008			No
37	Atlantic	ODP 658C	20.75	-18.5833	marine	dust	5.5	-5500	deMenocal, P., J. Ortiz, T. Guilderson, J. Adkins, M. Sarnthein, L. Baker, and M. Yarusinsky (2000), Abrupt onset and termination of the African Humid Period:: rapid climate responses to gradual insolation forcing, Quaternary Science Reviews, 19(15), 347 – 361, doi:http://dx.doi.org/ 10.1016/S0277-3791(99)00081-5.			No
38	Atlantic	GeoB7920-2	20.75	-17.4167	marine	charcoal, dust	6	-6000	Dupont LM, Schefuß E. The roles of fire in Holocene ecosystem changes of West Africa. Earth and Planetary Science Letters. 2018 Jan 1;481:255-63.			No
39	Mali	Ine Kousamene	20.6	-0.85	lake	stratigraphy	5.9	-5500	Hoelzmann, P. et al. in Past climate variability through Europe and Africa 219-256 (Springer, 2004); Hillaire-Marcel, C., Riser, J., Rognon, P., Petit-Maire, N., Rosso, J.C., Soulie-Marche, I. Radiocarbon chronology of Holocene hydrologic changes in northeastern Mali. Quaternary Research 20, 145-164 (1983).			No
40	Algeria	I-n-Atei	20.4741	6.3236	lake	stratigraphy	5.9	-5500	Lécuyer C, Lézine AM, Fourel F, Gasse F, Sylvestre F, Pailles C, Grenier C, Travi Y, Barral A. In-Atei palaeolake documents past environmental changes in central Sahara at the time of the “Green Sahara”: Charcoal, carbon isotope and diatom records. Palaeogeography, Palaeoclimatology, Palaeoecology. 2016 Jan 1;441:834-44.			No
41	Niger	Adrar Bous	20.29	9.01	lake	d18O, stratigraphy, biological	5.7	-5500	Hoelzmann, P. et al. in Past climate variability through Europe and Africa 219-256 (Springer, 2004); Gasse, F., Téhet, R., Durand, A., Gibert, E., Fontes, J.C. The arid-humid transition in the Sahara and the Sahel during the last deglaciation. Nature 345, 141-146 (1990); Gasse, F. Diatom-inferred salinity and carbonate oxygen isotopes in Holocene waterbodies of the western Sahara and Sahel (Afric…			No
42	Atlantic	GeoB7926-2	20.2167	-18.45	marine	K (terrigenous supply)	0	0	Romero OE, Kim JH, Donner B. Submillennial‐to‐millennial variability of diatom production off Mauritania, NW Africa, during the last glacial cycle. Paleoceanography and Paleoclimatology. 2008 Sep 1;23(3).			No
43	Niger	Tin Ouaffadene	20.18	9.19	lake	d18O, stratigraphy, terrigenous	8.1	-8000	Hoelzmann, P. et al. in Past climate variability through Europe and Africa 219-256 (Springer, 2004); Gasse, F., Téhet, R., Durand, A., Gibert, E., Fontes, J.C. The arid-humid transition in the Sahara and the Sahel during the last deglaciation. Nature 345, 141-146 (1990); Gasse, F. Diatom-inferred salinity and carbonate oxygen isotopes in Holocene waterbodies of the western Sahara and Sahel (Afric…			No
44	Niger	Segedim	20.17	12.78	peat	pollen	7.3	-7000	Hoelzmann, P. et al. in Past climate variability through Europe and Africa 219-256 (Springer, 2004); Baumhauer, R. Palaeolakes of the south central Sahara – problems of palaeoclimatological interpretation. Hydrobiologia 214, 347-357 (1991); Baumhauer, R., Schulz, E. & Pomel, S. in Paleoecology of Quaternary Drylands 31-45 (Springer, 2004).	rounding		No
45	Arabian Sea	OC437-66	19.944	-17.86	marine	dust	5.6	-5500	McGee, D., P. deMenocal, G. Winckler, J. Stuut, and L. Bradtmiller (2013), The magnitude, timing and abruptness of changes in North African dust deposition over the last 20,000 yr, Earth and Planetary Science Letters, 371, 163–176.			No
46	Atlantic	GC68	19.363	-17.282	marine	dDwax	6.28	-6000	Tierney JE, Pausata FS. Rainfall regimes of the Green Sahara. Science advances. 2017 Jan 1;3(1):e1601503.	now using dD		now using dD
47	Sudan	Oyo	19.27	26.18	lake	stratigraphy, pollen	7	-7000	Hoelzmann, P. et al. in Past climate variability through Europe and Africa 219-256 (Springer, 2004); Haynes, C. V. in Prehistory of Arid North Africa (ed A.E. Close) 69-85 (Southern Methodist University Press, 1987); Haynes, C. V. Geochronology and climat change of the Pleistocene-Holocene transition in the Darb el Arba’in Desert, Eastern Sahara. Geoarchaeology 16, 119-141 (2001); Ritchie, J. C.,…			altered from stratigraphy - now using pollen
48	Sahara	Yoa	19.03	20.31	lake	pollen/hydro	5.2	-5000	Kröpelin, S., D. Verschuren, A.-M. L´ezine, H. Eggermont, C. Cocquyt, P. Francus, J.-P. Cazet, M. Fagot, B. Rumes, J. Russell, et al. (2008), Climate-driven ecosystem succession in the Sahara: the past 6000 years, Science, 320(5877), 765–768.			No
49	Sudan	Wadi Fesh Fesh	18.9	17.9	lake	stratigraphy, biological, geochemistry	8.2	-8000	Hoelzmann, P., Keding, B., Berke, H., Kröpelin, S., Kruse, H.J. Environmental change and archaeology: lake evolution and human occupation in the Eastern Sahara during the Holocene. Palaeogeography, Palaeoclimatology, Palaeocology 169, 193-217 (2001); Pachur, H. J., Kröpelin, S., Hoelzmann, P., Goschin, M., Altmann, N. Late quaternary fluvio-lacustrine environments of Western Nubian. Berliner Geow…			reeval to indicate initial drop from highstand (second drop is at 5.1 kyr is missing/deflatd)
50	Sudan	West Nubian Paleolake Basin	18.66	25.33	lake	carbonates	8.3	-8000	Hoelzmann, P., Kruse, H.-J. and Rottinger, F., 2000. Precipitation estimates for the eastern Saharan palaeomonsoon based on a water balance model of the West Nubian Palaeolake Basin. Global and Planetary Change, 26: 105-120; Hoelzmann, P., Keding, B., Berke, H., et al., 2001. Environmental change and archaeology: lake evolution and human occupaation in the eastern Sahara during the Holocene. Pala…			No
51	Niger	Kawar	18.6	13.08	lake	stratigraphy, biological, geochemistry	5	-5000	Hoelzmann, P. et al. in Past climate variability through Europe and Africa 219-256 (Springer, 2004); Baumhauer, R. Palaeolakes of the south central Sahara – problems of palaeoclimatological interpretation. Hydrobiologia 214, 347-357 (1991); Servant, M. Sequences continentales et variations climatiques: evolution du bassin du Tchad au Cenozoique superieur. 573 (Orstom, 1983).			No
52	Sudan	Atrun	18.17	26.15	lake	pollen	7.8	-7500	Hoelzmann, P. et al. in Past climate variability through Europe and Africa 219-256 (Springer, 2004); Pachur, H. J., Kröpelin, S., Hoelzmann, P., Goschin, M., Altmann, N. Late quaternary fluvio-lacustrine environments of Western Nubian. Berliner Geowissenschaftliche Abhandlungen (A) 120, 203-260 (1990); Pachur, H. J., Hoelzmann, P. Palaeoclimatic implications of Late Quaternary Lacustrine sediment…			altered from stratigraphy - now using pollen
53	Niger	Fachi	18.1	11.3	lake	stratigraphy	8.22	-8000	Hoelzmann, P. et al. in Past climate variability through Europe and Africa 219-256 (Springer, 2004); Baumhauer, R. Palaeolakes of the south central Sahara – problems of palaeoclimatological interpretation. Hydrobiologia 214, 347-357 (1991); Servant, M. Sequences continentales et variations climatiques: evolution du bassin du Tchad au Cenozoique superieur. 573 (Orstom, 1983).			reeval to indicate initial drop from highstand (second drop is at 5.1 kyr is missing/deflatd)
54	Arabian Sea	RC27-23	18	57.59	marine	d18O,G. Bull.	4.5	-4500	Overpeck J, Anderson D, Trumbore S, Prell W. The southwest Indian Monsoon over the last 18 000 years. Climate Dynamics. 1996 Feb 1;12(3):213-25.			No
55	Sudan	Wadi Howar	17.6	27.5	lake	stratigraphy, pollen	5.2	-5000	Hoelzmann, P. et al. in Past climate variability through Europe and Africa. 219-256 (Springer, 2004); Pachur, H. J., Kröpelin, S., Hoelzmann, P., Goschin, M., Altmann, N. Late quaternary fluvio-lacustrine environments of Western Nubian. Berliner Geowissenschaftliche Abhandlungen (A) 120, 203-260 (1990); Pachur, H. J., Hoelzmann, P. Palaeoclimatic implications of Late Quaternary Lacustrine sedimen…			No
56	Niger	Dibella	17.53	13.13	lake	stratigraphy	7.9	-7500	Grunert, J., Baumhauser, R., Vökel, J. Lacustrine sediments and Holocene climates in the southern Sahara: the example of paleolakes in the Grand Erg of Bilma (Zoo Baba and Dibelle, eastern Niger). Journal of African Earth Sciences 12, 133-146 (1991)			No
57	Oman	Qunf Cave	17.17	54.3	cave	d18O	7.8	-7500	Fleitmann, D., S. J. Burns, M. Mudelsee, U. Neff, J. Kramers, A. Mangini, and A. Matter (2003), Holocene forcing of the Indian monsoon recorded in a stalagmite from southern Oman, Science, 300(5626), 1737–1739.			No
58	Sudan	Lake Gureinat	16.97	27.3	lake	d18O, geochemistry	7.8	-7500	Hoelzmann, P., Schwab, A., Robers, N., Cooper, P., Burgess, A. Hydrological response of an east-Saharan palaeolake (NW Sudan) to early-Holocene climate. The Holocene 20, 537-549 (2010).			No
59	Sudan	ridge lake T175	16.6	27.63	lake	stratigraphy, biological	8.4	-8000	Hoelzmann, P. et al. in Past climate variability through Europe and Africa 219-256 (Springer, 2004);Pachur, H. J., Kröpelin, S., Hoelzmann, P., Goschin, M., Altmann, N. Late quaternary fluvio-lacustrine environments of Western Nubian. Berliner Geowissenschaftliche Abhandlungen (A) 120, 203-260 (1990); Pachur, H. J., Hoelzmann, P. Palaeoclimatic implications of Late Quaternary Lacustrine sediments…			No
60	Niger	Termit	16	11.25	lake	stratigraphy, biological, geochemistry	4.5	-4500	Gasse, F. Diatom-inferred salinity and carbonate oxygen isotopes in Holocene waterbodies of the western Sahara and Sahel (Africa). Quaternary Science Reviews 21, 737-767 (2002); Garba, Z., Durand, A., Lang, J. Enregistrement sédimentaire des variations de la dynamique éolienne pendant la transition Tardiglaciaire/Holocène à la limite Sahara/Sahel (Termit, bassin du lac Tchad). Zeitschrift für Geo…			No
61	Senegal	GeoB9508-5	15.4983	-17.948	marine	dDwax	3.9	-3500	Niedermeyer, E. M., E. Schefuß, A. L. Sessions, S. Mulitza, G. Mollenhauer, M. Schulz, and G. Wefer (2010), Orbital-and millennial-scale changes in the hydrologic cycle and vegetation in the western African sahel: insights from individual plant wax δDwax and δ13Cwax, Quaternary Science Reviews, 29(23), 2996–3005.			No
62	Chad	Bahr el Ghazal	15.42	18.02	lake	stratigraphy	4.3	-4000	Gasse, F. & Van Campo, E. Abrupt post-glacial climate events in West Asia and North Africa monsoon domains. Earth and Planetary Science Letters 126, 435-456 (1994); Servant, M. & Servant-Vildary, S. L'environnement quaternaire du bassin du Tchad. The Sahara and the Nile, 133-162 (1980).			No
63	Sudan	Wadi Mansurab	15.42	32.22	lake	d18O, stratigraphy	7.8	-7500	Ayliffe, D., Williams, M.A.J., Sheldon, F. Stable isotope and ocygen isotopic composition of early-Holocene gastropods from Wadi Mansurab, north-central Sudan. The Holocene 6, 157-169 (1996); Williams, M. A. J., Adamson, D.A. in The Sahara and the Nile (ed M.A.J. Williams, Faure, H.) 281-304 (Balkema, 1981)			No
64	Sudan	Meidob Hills	15.35	26.35	lake	stratigraphy, geochemistry	4.9	-4500	Hoelzmann, P. et al. in Past climate variability through Europe and Africa 219-256 (Springer, 2004); Pachur, H. J., Wünnemann, B. Reconstruction of the palaeoclimate along 30° E in the eastern Sahara during the Pleistocene/ Holocene transition. Palaeoecology of Africa 26, 1-32 (1996); Pachur, H. J., Hoelzmann, P. Late Quaternary palaeoecology and palaeoclimates of the eastern Sahara. Journal of A…			No
65	Senegal	Diogo	15.26	-16.8	lake	pollen	1.9	-1500	Lezine, A.-M. & Chateauneuf, J.-J. Peat in the "Niayes" of Senegal: depositional environment and Holocene evolution. Journal of African Earth Sciences (and the Middle East) 12, 171-179 (1991)			No
66	Burkina Faso	Oursi	14.65	-0.13	lake	pollen	3.2	-3000	Ballouche, A. & Neumann, K. A new contribution to the Holocene vegetation history of the West African Sahel: pollen from Oursi, Burkina Faso and charcoal from three sites in northeast Nigeria. Vegetation History and Archaeobotany 4, 31-39 (1995).			No
67	Mali	Ounjougou	14.6	-3.07	lake	stratigraphy	5.3	-5000	Lespez, L. et al. High-resolution fluvial records of Holocene environmental changes in the Sahel: the YamE River at Ounjougou (Mali, West Africa). Quaternary Science Reviews 30, 737-756, doi:10.1016/j.quascirev.2010.12.021 (2011).			No
68	Arabian Sea	74KL	14.32	57.35	marine	d18O	5.8	-5500	Sirocko F, Sarnthein M, Erlenkeuser H, Lange H, Arnold M, Duplessy JC. Century-scale events in monsoonal climate over the past 24,000 years. Nature. 1993 Jul;364(6435):322.			No
69	chad	Lake Tjeri	13.7333	16.5	lake	pollen	5	-5000	Maley, J. (1981): Etudes palynologiques dans le bassin du Tchad et paleoclimatologie de l'Afrique nord tropicale de 30,000 ans a l'époque actuelle.- ORSTOM (Trav. Doc. 129): 586 S.; Paris.			No
70	Niger	Bougdouma	13.32	11.67	lake	stratigraphy, biological	4.2	-4000	Gasse, F., Téhet, R., Durand, A., Gibert, E., Fontes, J.C. The arid-humid transition in the Sahara and the Sahel during the last deglaciation. Nature 345, 141-146 (1990); Gasse, F. Diatom-inferred salinity and carbonate oxygen isotopes in Holocene waterbodies of the western Sahara and Sahel (Africa). Quaternary Science Reviews 21, 737-767 (2002).			No
71	Nigeria	Jikariya Lake, Manga	13.31	11.08	lake	pollen	3.4	-3000	Waller, M. P., Street-Perrott, F. A. & Wang, H. Holocene vegetation history of the Sahel: pollen, sedimentological and geochemical data from Jikariya Lake, north-eastern Nigeria. Journal of Biogeography 34, 1575-1590, doi:10.1111/j.1365-2699.2007.01721.x (2007).			No
72	Nigeria	Kajemarum	13.3	11.0167	lake	pollen	3.3	-3000	Hoelzmann, P. et al. in Past climate variability through Europe and Africa. 219-256 (Springer, 2004); Gasse, F. Diatom-inferred salinity and carbonate oxygen isotopes in Holocene waterbodies of the western Sahara and Sahel (Africa). Quaternary Science Reviews 21, 737-767 (2002); Salzmann, U., Waller, M. The Holocene vegetational history of the Nigerian Sahel based on multiple pollen profiles. Rev…			No
73	Nigeria	Lake Bal	13.3	10.9333	lake	stratigraphy	3.3	-3000	Salzmann, U., Waller, M. The Holocene vegetational history of the Nigerian Sahel based on multiple pollen profiles. Review of Palaeobotany and Palynology 100, 39-72 (1998)			No
74	Nigeria	Kaigama	13.25	11.56	lake	pollen	3.9	-3500	Salzmann, U., Waller, M. The Holocene vegetational history of the Nigerian Sahel based on multiple pollen profiles. Review of Palaeobotany and Palynology 100, 39-72 (1998)			No
75	Nigeria	Kuluwu oasis	13.2167	11.55	lake	pollen	3.3	-3000	Salzmann, U., Waller, M. The Holocene vegetational history of the Nigerian Sahel based on multiple pollen profiles. Review of Palaeobotany and Palynology 100, 39-72 (1998)			No
76	Chad	Lake Chad	13.1542	14.5707	lake	shoreline	3.1	-3000	Armitage SJ, Bristow CS, Drake NA. West African monsoon dynamics inferred from abrupt fluctuations of Lake Mega-Chad. Proceedings of the National Academy of Sciences. 2015 Jul 14;112(28):8543-8.			No
77	Nigeria	Komadugo	12.83	12	lake	stratigraphy	3.5	-3500	Gumnior, M., Preusser, F. Late Quaternary river development in the southwest Chad Basin: OSL dating of sediment from the Komadugu palaeofloodplain (northeast Nigeria). Journal of Quaternary Science 22, 709–719 (2007).			low resolution - initiation could be earlier (~ 5.5 kyr)
78	Ethiopia	L Ashenge	12.58	39.48	lake	diatom/isotope	5.6	-5500	Marshall, M. H., H. F. Lamb, S. J. Davies, M. J. Leng, Z. Kubsa, M. Umer, and C. Bryant (2009), Climatic change in northern Ethiopia during the past 17,000 years: a diatom and stable isotope record from Lake Ashenge, Palaeogeography, Palaeoclimatology, Palaeoecology, 279(1), 114–127.			No
79	Ethiopia	L Tana	12	37.25	lake	dD	8.3	-8000	Costa, K., J. Russell, B. Konecky, and H. Lamb (2014), Isotopic reconstruction of the African Humid Period and Congo Air Boundary migration at Lake Tana, Ethiopia, Quaternary Science Reviews, 83(0), 58 – 67, doi:http://dx.doi.org/10.1016/j.quascirev.2013.10.031.			No
80	Aden	P178-15P	11.955	44.3	marine	dD	5.1	-5000	Tierney, J. E., et al. (2013), Abrupt shifts in Horn of Africa hydroclimate since the Last Glacial Maximum, Science, 342(6160), 843–846.			No
81	Ethiopia	Lake Hyak	11.3481	39.7089	lake	diatom	5.2	-5000	Loakes KL, Ryves DB, Lamb HF, Schäbitz F, Dee M, Tyler JJ, Mills K, McGowan S. Late Quaternary climate change in the north-eastern highlands of Ethiopia: A high resolution 15,600 year diatom and pigment record from Lake Hayk. Quaternary Science Reviews. 2018 Dec 15;202:166-81.			No
82	Ethiopia	L Abhe	11.2	41.8	lake	Shoreline	4.5	-4500	Gasse, E., Street, F., 1978. Late Quaternary lake-level fluctuations and environments of the northern Rift Valley and Afar region (Ethiopia and Djibouti). Palaeogeography, Palaeoclimatology, Palaeoecology 24, 279-325.			No
83	Arabian Sea	NIOP905	10.77	51.95	marine	geochemistry	8.2	-8000	Jung, S., G. Davies, G. Ganssen, and D. Kroon (2004), Stepwise Holocene aridification in NE Africa deduced from dust-borne radiogenic isotope records, Earth and Planetary Science Letters, 221(1), 27–37.			No
84	Nigeria	L Tilla	10.3833	12.1333	lake	pollen stratigraphy	3.5	-3500	Salzmann, U., Hoelzmann, P. & Morczinek, I. Late Quaternary climate and vegetation of the Sudanian zone of northeast Nigeria. Quaternary Research 58, 73-83 (2002)			No
85	Ethiopia	Ziway Shalla	7.98	38.83	lake	stratigraphy	4.5	-4500	Benvenuti, M. et al. The Ziway-Shala lake basin (Main Ethiopian rift, Ethiopia): a revision of basin evolution with special reference to the Late Quaternary. Journal of African Earth Sciences 35, 247-269 (2002).			No
86	Ethiopia	Lake Abiyata	7.66667	38.6667	lake	diatom	5.5	-5500	Chalié, F., Gasse, F., 2002. Late Glacial–Holocene diatom record of water chemistry and lake level change from the tropical East African Rift Lake Abiyata (Ethiopia). Palaeogeography, Palaeoclimatology, Palaeoecology 187, 259-283.			reeval to indentify initial drop
87	Cameroon	L. Mbalang	7.32	13.73	lake	pollen	3.2	-3000	Vincens, A., G. Buchet, M. Servant, et al. (2010), Vegetation response to the “African Humid Period” termination in Central Cameroon (7°N)– new pollen insight from Lake Mbalang, Climate of the Past, 6(3), 281– 294.			No
88	Cameroon	Tizong	7.25	13.5833	lake	pollen	3.1	-3000	Lebamba J, Vincens A, Lézine AM, Marchant R, Buchet G. Forest-savannah dynamics on the Adamawa plateau (Central Cameroon) during the “African humid period” termination: A new high-resolution pollen record from Lake Tizong. Review of Palaeobotany and Palynology. 2016 Dec 1;235:129-39.			No
89	S Benin	L. Sele	7.15	2.43	lake	pollen	4.3	-4000	Salzmann, U., and P. Hoelzmann (2005), The Dahomey Gap: an abrupt climatically induced rain forest fragmentation in West Africa during the late Holocene, The Holocene, 15(2), 190–199.			No
90	Ethiopia	Lake Awassa	7.1	38.55	lake	d18O	4.9	-4500	Lamb, A.L., Leng, M.J., Lamb, H.F., et al., 2002. Climatic and non-climatic effects on the d18Oand d13C compositions of Lake Awassa, Ethiopia, during the last 6.5 ka. Quaternary Science Reviews, 21: 2199-2211.			No
91	Ethiopia	Lake Tilo	7.06	38.1	lake	d18O	5.5	-5500	Lamb, A.L., Leng, M.J., Umer Mohammed, M., et al., 2004. Holocene climate and vegetation change in the Main Ethiopian Rift Valley, inferred from the composition (C/N and δ13C) of lacustrine organic matter. Quaternary Science Reviews, 23: 881-891.			No
92	Ethiopia	Lake Garba Guracha	6.87	39.82	lake	TOC	5.1	-5000	Tiercelin, J.J., Gibert, E., Umer, M., et al., 2008. High-resolution sedimentary record of the last deglaciation from a high-altitude lake in Ethiopia. Quaternary Science Reviews, 27: 449-467.			No
93	Benin	Dangbo	6.61	2.6	peat	pollen	3	-3000	Tossou, M. G., Akoegninou, A., Ballouche, A., Sowunmi, M. A. & Akpagana, K. The history of the mangrove vegetation in Benin during the Holocene: A palynological study. Journal of African Earth Sciences 52, 167-174, doi:10.1016/j.jafrearsci.2008.07.007 (2008).			No
94	Bosumtwi	Bosumtwi	6.5	-1.42	lake	dD wax	3.8	-3500	Shanahan TM, McKay NP, Hughen KA, Overpeck JT, Otto-Bliesner B, Heil CW, King J, Scholz CA, Peck J. The time-transgressive termination of the African Humid Period. Nature Geoscience. 2015 Feb;8(2):140			No
95	Cameroon	Njupi	6.45	10.32	lake	pollen	2.5	-2500	Lézine, A. Timing of vegetation changes at the end of the Holocene Humid Period in desert areas at the northern edge of the Atlantic and Indian monsoon systems. Comptes rendus-Géoscience 341, 750-759 (2009); Vincens, A. et al. Forest response to climate changes in Atlantic Equatorial Africa during the last 4000 years BP and inheritance on the modern landscapes. Journal of Biogeography 26, 879-885…			No
96	Benin	Goho	6.44	2.58	peat	pollen	2.5	-2500	Tossou, M. G., Akoegninou, A., Ballouche, A., Sowunmi, M. A. & Akpagana, K. The history of the mangrove vegetation in Benin during the Holocene: A palynological study. Journal of African Earth Sciences 52, 167-174, doi:10.1016/j.jafrearsci.2008.07.007 (2008).			revised based on integrated record of three lakes
97	Niger	Badagry	6.43	2.77	peat	pollen	3.3	-3000	Sowunmi, M. A. in Past climate variability through Europe and Africa 199-218 (Springer, 2004).			No
98	Cameroon	Bambili	5.93	10.23	lake	pollen	3.5	-3500	Lézine AM, Assi‐Kaudjhis C, Roche E, Vincens A, Achoundong G. Towards an understanding of West African montane forest response to climate change. Journal of Biogeography. 2013 Jan 1;40(1):183-96.			No
99	Congo	Shum Laka	5.85	10.05	peat	pollen	3	-3000	Kadomura, H. in Savannization Processes in Tropical Africa II (ed H. Kadomura, Kiyonaga, J.) 47–85 (Tokyo Metropolitan University, 1994); Moeyersons, J. Geomorphological processes and their paleoenvironmental significance at the Shum Laka cave (Bamenda, western Cameroon). Palaeogeography, Palaeoclimatology, Palaeoecology 133, 103-116 (1997).			No
100	Cameroon	Bafounda Swamp	5.53	10.33	swamp	pollen	3.1	-3000	Lézine, A. Timing of vegetation changes at the end of the Holocene Humid Period in desert areas at the northern edge of the Atlantic and Indian monsoon systems. Comptes rendus-Géoscience 341, 750-759 (2009); Tamura, T. Late Quaternary landscape evolution in the west Cameroon Highlands and the Adamaoua Plateau. Paysages Quaternaires de L‚ÄôAfrique Centrale Atlantique. Paris: Editions de l‚ÄôOrstom…			No
101	Ivory Coast	Agneby	5.33	-4.25	peat	pollen	0	0	Fredoux, A. Evolution de la vegetation dans le delta de l'Agneby (Cote-d'Ivoire). Travaux et documents de geographie tropicale, 117-134 (1983).			No
102	Congo	Mbari Valley	5.08	23.08	Alluvial soils	d13C	4	-4000	Runge, J., 2002. Holocene landscape history and palaeohydrology evidenced by stable carbon isotope (d13C) analysis of alluvial sediments in the Mbari valley (5jN/23jE), Central African Republic. Catena, 48: 67-87.			No
103	Chew Bahir	CB01-09	4.84	36.78	lake	K XRF	6	-6000	Foerster, V., A. Junginger, O. Langkamp, T. Gebru, A. Asrat, M. Umer, H. F. Lamb, V. Wennrich, J. Rethemeyer, N. Nowaczyk, et al. (2012), Climatic change recorded in the sediments of the Chew Bahir basin, southern Ethiopia, during the last 45,000 years, Quaternary International, 274, 25–37.			No
104	Gulf of Guinea	Shell fan 17	4.81	4.45	marine	Ba/Ca	6	-6000	Parker AO, Schmidt MW, Jobe ZR, Slowey NC. A new perspective on West African hydroclimate during the last deglaciation. Earth and Planetary Science Letters. 2016 Sep 1;449:79-88.			No
105	Cameroon	Barombi Mbo	4.66667	9.4	lake	dD	6.7	-6500	Garcin Y, Deschamps P, Ménot G, De Saulieu G, Schefuß E, Sebag D, Dupont LM, Oslisly R, Brademann B, Mbusnum KG, Onana JM. Early anthropogenic impact on Western Central African rainforests 2,600 y ago. Proceedings of the National Academy of Sciences. 2018 Mar 27;115(13):3261-6.	now using dD		now using dD
106	Cameroon	Lake Ossa	3.8	10.75	lake	pollen	2.8	-2500	Giresse, P., Maley, J. & Kossoni, A. Sedimentary environmental changes and millennial climatic variability in a tropical shallow lake (Lake Ossa, Cameroon) during the Holocene. Paleogeogr. Paleoclimatol. Paleoecol. 218, 257-285 (2005); Reynaud-Farrera, I., Maley, J. & Wirrmann, D. Végétation et climat dans les forêts du Sud-Ouest Cameroun depuis 4770 ans BP: analyse pollinique des sédiments du La…			No
107	Kenya	turkana	3.43	36.06	lake	Shoreline	5.21	-5000	Garcin, Y., D. Melnick, M. R. Strecker, D. Olago, and J.-J. Tiercelin (2012), East African mid-Holocene wetdry transition recorded in palaeoshorelines of Lake Turkana, northern Kenya Rift, Earth and Planetary Science Letters, 331332(0), 322 – 334, doi:http://dx.doi.org/10.1016/j. epsl.2012.03.016.			No
108	Cameroon	Nyabessan	2.67	10.67	lake	pollen	3	-3000	Ngomanda, A., K. Neumann, A. Schweizer, J. Maley. Seasonality change and the third millennium BP rainforest crisis in Central Africa: a high resolution pollen profile from Nyabessan, southern Cameroon. Quaternary Research 71, 307-318 (2009).			No
109	Gulf of Guinea	MD03-2707	2.50183	9.39467	marine	Ba/Ca	5.2	-5000	Weldeab, S., D. W. Lea, R. R. Schneider, and N. Andersen (2007), Centennial scale climate instabilities in a wet early Holocene West African monsoon, Geophysical Research Letters, 34(24).			initial drop is early at 5.2
110	Gulf of Guinea	GeoB4905-4	2.5	9.39	marine	dD wax	5.62	-5500	Collins JA, Prange M, Caley T, Gimeno L, Beckmann B, Mulitza S, Skonieczny C, Roche D, Schefuß E. Rapid termination of the African Humid Period triggered by northern high-latitude cooling. Nature communications. 2017 Nov 8;8(1):1372.	now using dD		now using dD
111	Congo	Mopo Bai	2.24	16.93	lake	pollen	0	0	Brncic, T. M., Willis, K. J., Harris, D. J., Telfer, M. W. & Bailey, R. M. Fire and climate change impacts on lowland forest composition in northern Congo during the last 2580 years from palaeoecological analyses of a seasonally flooded swamp. The Holocene 19, 79-89 (2009).			No
112	Congo	Lake Goualougo	2.16	16.51	lake	pollen	0	0	Brncic, T. M., Willis, K. J., Harris, D. J. & Washington, R. Culture or climate? The relative influences of past processes on the composition of the lowland Congo rainforest. Philos T R Soc B 362, 229-242, doi:10.1098/rstb.2006.1982 (2007).			No
113	Kenya	Lake Sugata	2	36.5	lake	stratigraphy	6.7	-6500	Junginger, A., S. Roller, L. A. Olaka, and M. H. Trauth (2014), The effects of solar irradiation changes on the migration of the Congo Air Boundary and water levels of paleo-Lake Suguta, Northern Kenya Rift, during the African Humid Period (15–5 ka BP), Palaeogeography, Palaeoclimatology, Palaeoecology, 396(0), 1 – 16, doi:http://dx.doi.org/10.1016/j. palaeo.2013.12.007.			No
114	Congo	Lake Tele	1.33	17.17	lake	pollen	0	0	Laraque, A. et al. Reconnaissance scientifique du lac Télé (Nord-Congo) —Premiers résultats et interprétations. Comptes Rendus de l'Académie des Sciences - Series IIA - Earth and Planetary Science 325, 49-56 (1997).			No
115	Uganda	Muchoya	1.28	29.8	lake	pollen	4	-4000	Taylor, D. Late Quaternary pollen records from two Ugandan mires: Evidence for environmental change in the Rukiga Highlands of southwest Uganda. Palaeogeography, Palaeoclimatology, Palaeoecology 80, 283-300 (1990).			No
116	Kenya	Mt Satima Mire, kenya	0.3	36.58	peat	geochemistry	3.5	-3500	Street-Perrott FA, Perrott RA. Abrupt climate fluctuations in the tropics: the influence of Atlantic Ocean circulation. Nature. 1990 Feb;343(6259):607.			No
117	Uganda	Pilkington Bay	0.3	33.33	lake	diatom	5.8	-5500	Stager, J.C., Cumming, B.F., Meeker, L.D., 2003. A 10,000-year high-resolution diatom record from Pilkington Bay, Lake Victoria, East Africa. Quat. Res. 59, 172-181.			No
118	Kenya	Sacred Lake	0.05	37.51	lake	d13C	5.5	-5500	Street-Perrott, F.A., Barker, P.A., Swain, D.L., et al., 2007. Late Quaternary changes in ecosystems and carbon cycling on Mt. Kenya, East Africa: a landscape-ecological perspective based on multi-proxy lake-sediment influxes. Quaternary Science Reviews, 26: 1838-1860.			No
119	Kenya	Small Hall Tarn	-0.15	37.35	lake	d13C	6.3	-6000	Barker, P.A., Street-Perrott, F.A., Leng, M.J., et al., 2001. A 14,000-year oxygen isotope record from diatom silica in two alpine lakes on Mt. Kenya. Science, 292: 2307-10.			No
120	Gabon	Lake Maridor	-0.17	9.35	lake	pollen	3.5	-3500	Lézine, A. Timing of vegetation changes at the end of the Holocene Humid Period in desert areas at the northern edge of the Atlantic and Indian monsoon systems. Comptes rendus-Géoscience 341, 750-759 (2009).; Vincens, A. et al. Forest response to climate changes in Atlantic Equatorial Africa during the last 4000 years BP and inheritance on the modern landscapes. Journal of Biogeography 26, 879-88…			No
121	Gabon	Lake Nguene	-0.2	10.47	lake	pollen	4	-4000	Lézine, A. Timing of vegetation changes at the end of the Holocene Humid Period in desert areas at the northern edge of the Atlantic and Indian monsoon systems. Comptes rendus-Géoscience 341, 750-759 (2009).; Vincens, A. et al. Forest response to climate changes in Atlantic Equatorial Africa during the last 4000 years BP and inheritance on the modern landscapes. Journal of Biogeography 26, 879-88…			No
122	Uganda	Lake Edward	-0.32	29.58	lake	%calcite	5.1	-5000	Russell, J.M., Johnson, T.C., Kelts, K.R., Lærdal, T., Talbot, M.R., 2003. An 11 000-year lithostratigraphic and paleohydrologic record from Equatorial Africa: Lake Edward, Uganda–Congo. Palaeogeography, Palaeoclimatology, Palaeoecology 193, 25-49.			No
123	Uganda	Lake Edward	-0.41	29.58	lake	pollen	5.2	-5000	Ivory, S. J., & Russell, J. (2018). Lowland forest collapse and early human impacts at the end of the African Humid Period at Lake Edward, equatorial East Africa. Quaternary Research, 89(1), 7-20.			No
124	Kenya	Lake Naivasha	-0.78	36.35	lake	pollen	7.4	-7000	Maitima, J.M., 1991. Vegetation Response to Climatic-Change in Central Rift-Valley, Kenya. Quat. Res. 35, 234-245.			No
125	Uganda	Lake Victoria	-1.23	33.2	lake	δD wax	7.87	-7500	Berke, M. A., T. C. Johnson, J. P. Werne, K. Grice, S. Schouten, and J. S. Sinninghe Damsté (2012b), Molecular records of climate variability and vegetation response since the Late Pleistocene in the Lake Victoria basin, East Africa, Quaternary Science Reviews, 55, 59–74.			No
126	Tanzania	Kilimanjaro	-3.08	37.35	ice core	δ18O	4.1	-4000	Thompson, L.G., Mosley-Thompson, E., Davis, M.E., Henderson, K.A., Brecher, H.H., Zagorodnov, V.S., Mashiotta, T.A., Lin, P.N., Mikhalenko, V.N., Hardy, D.R., Beer, J., 2002. Kilimanjaro ice core records: evidence of holocene climate change in tropical Africa. Science 298, 589-593.			No
127	Tanzania	Challa	-3.32	37.7	lake	dD	4.9	-4500	Tierney, J. E., J. M. Russell, J. S. Sinninghe Damsté, Y. Huang, and D. Verschuren (2011), Late Quaternary behavior of the East African monsoon and the importance of the Congo Air Boundary, Quaternary Science Reviews, 30(78), 798 – 807, doi:http://dx.doi.org/10.1016/j.quascirev. 2011.01.017.			No
128	Burundi	Rusaka 1 (Ru-1)	-3.43	29.62	peat	pollen	3.8	-3500	Bonnefille R, Chalié F. Pollen-inferred precipitation time-series from equatorial mountains, Africa, the last 40 kyr BP. Global and Planetary Change. 2000 Nov 1;26(1-3):25-50.; Bonnefille R, Riollet G, Buchet G, Icole M, Lafont R, Arnold M, Jolly D. Glacialanterglacial record from intertropical Africa, high resolution pollen and carbon data at Rusaka, Burundi. Quaternary Science Reviews. 1995 Jan…			No
129	Burundi	Kashiru 1 (Ka-1)	-3.45	29.53	peat	pollen	3.8	-3500	Bonnefille R, Chalié F. Pollen-inferred precipitation time-series from equatorial mountains, Africa, the last 40 kyr BP. Global and Planetary Change. 2000 Nov 1;26(1-3):25-50.			No
130	Congo	Bilanko	-3.52	15.35	peat	pollen	3.3	-3000	Elenga, H., Maley, J., Vincens, A. & Farrera, I. in Past climate variability through Europe and Africa 181-198 (Springer, 2004)			No
131	Burundi	Kuruyange 1 (Ku-1)	-3.58	29.68	peat	pollen	4.2	-4000	Bonnefille R, Chalié F. Pollen-inferred precipitation time-series from equatorial mountains, Africa, the last 40 kyr BP. Global and Planetary Change. 2000 Nov 1;26(1-3):25-50.			No
132	Burundi	Gitanga (Gi-2)	-3.7	29.77	peat	pollen	4.5	-4500	Bonnefille R, Chalié F. Pollen-inferred precipitation time-series from equatorial mountains, Africa, the last 40 kyr BP. Global and Planetary Change. 2000 Nov 1;26(1-3):25-50.			No
133	Congo	Sinnda	-3.84	12.8	peat	pollen	4	-4000	Vincens, A. et al. Forest response to climate changes in Atlantic Equatorial Africa during the last 4000 years BP and inheritance on the modern landscapes. Journal of Biogeography 26, 879-885 (1999).; Vincens, A., Schwartz, D., Bertaux, J., Elenga, H. & de Namur, C. Late Holocene climatic changes in western equatorial Africa inferred from pollen from Lake Sinnda, southern Congo. Quaternary Resear…			No
134	0	Jiji (Ji-2)	-3.92	29.67	peat	pollen	3.6	-3500	Bonnefille R, Chalié F. Pollen-inferred precipitation time-series from equatorial mountains, Africa, the last 40 kyr BP. Global and Planetary Change. 2000 Nov 1;26(1-3):25-50.			No
135	Congo	Ngamakala	-4.07	15.38	peat	pollen	3.5	-3500	Elenga, H., Schwartz, D. & Vincens, A. Pollen evidence of late Quaternary vegetation and inferred climate changes in Congo. Palaeogeography, Palaeoclimatology, Palaeoecology 109, 345-356 (1994).; Elenga, H. Végétation et climat du Congo depuis 24 000 ans B.P. : analyse palynologique de séquences sédimentaires du Pays Bateke et du littoral, Université de Droit d'Economie et des Sciences d'Aix-Mars…			No
136	Congo	Kitina	-4.25	11.98	peat	pollen	3.1	-3000	Lézine, A. Timing of vegetation changes at the end of the Holocene Humid Period in desert areas at the northern edge of the Atlantic and Indian monsoon systems. Comptes rendus-Géoscience 341, 750-759 (2009).; Vincens, A. et al. Forest response to climate changes in Atlantic Equatorial Africa during the last 4000 years BP and inheritance on the modern landscapes. Journal of Biogeography 26, 879-88…			No
137	Congo	Coraf	-4.75	11.85	peat	pollen	2.8	-2500	Lézine, A. Timing of vegetation changes at the end of the Holocene Humid Period in desert areas at the northern edge of the Atlantic and Indian monsoon systems. Comptes rendus-Géoscience 341, 750-759 (2009).; Vincens, A. et al. Forest response to climate changes in Atlantic Equatorial Africa during the last 4000 years BP and inheritance on the modern landscapes. Journal of Biogeography 26, 879-88…			No
138	Benin	Songolo	-4.76	11.86	peat	pollen	3.8	-3500	Elenga, H. et al. Le marais estuarien de la Songolo (Sud Congo) a l'Holocene moyen et recent. Bulletin de la Société Géologique de France 172, 359-366 (2001).; Lézine, A. Timing of vegetation changes at the end of the Holocene Humid Period in desert areas at the northern edge of the Atlantic and Indian monsoon systems. Comptes rendus-Géoscience 341, 750-759 (2009).; Vincens, A. et al. Forest resp…			No
