# Supplementary material for: The end of the African humid period as seen by a transient comprehensive Earth system model simulation of the last 8000 years
Source: Copernicus journal article supplement (doi:10.5194/cp-16-117-2020), 2020-01-15
Supplement: Supplementary file 3 [file cp-16-117-2020-supplement.zip › AHPproxies_README.txt]

Supplement to "The end of the African humid period as seen by a transient comprehensive Earth system model simulation of the last 8000 years"
by Anne Dallmeyer, Martin Claussen, Stephan Lorenz and Timothy Michael Shanahan

In the table AHPproxies.xls, all records used in this study are listed, the table is based on the synthesis of reconstructions compiled by Shanahan et al. (2015), i.e.: 
Site: Number of the site in this study
Location: geographical location of the site
core: Name of the record core
Lat, Lon: geographical coordinates
archive: type of the archive
proxy: type of proxy
end: reconstructed end of the AHP in kilo years before present
rounded: end of the AHP rounded in 500 year intervals, in years before present
reference: reference of the original publication
date change: indicating if the reconstructed end revised for this study deviate from the original synthesis by Shanahan et al (2015). The data has been revised by T.M. Shanahan.

Reference of the original synthesis:
Shanahan, T. M., Mckay, N. P., Hughen, K. A., Overpeck, J. T., Otto-Bliesner, B., Heil, C. W., King, J., Scholz, C. A., and Peck, J.: The time-transgressive termination of the African humid period, Nat. Geosci., 8, 140–144, https://doi.org/10.1038/ngeo2329, 2015.)
