# Supplementary figures and images for: The end of the African humid period as seen by a transient comprehensive Earth system model simulation of the last 8000 years
Source: Copernicus journal article supplement (doi:10.5194/cp-16-117-2020), 2020-01-15

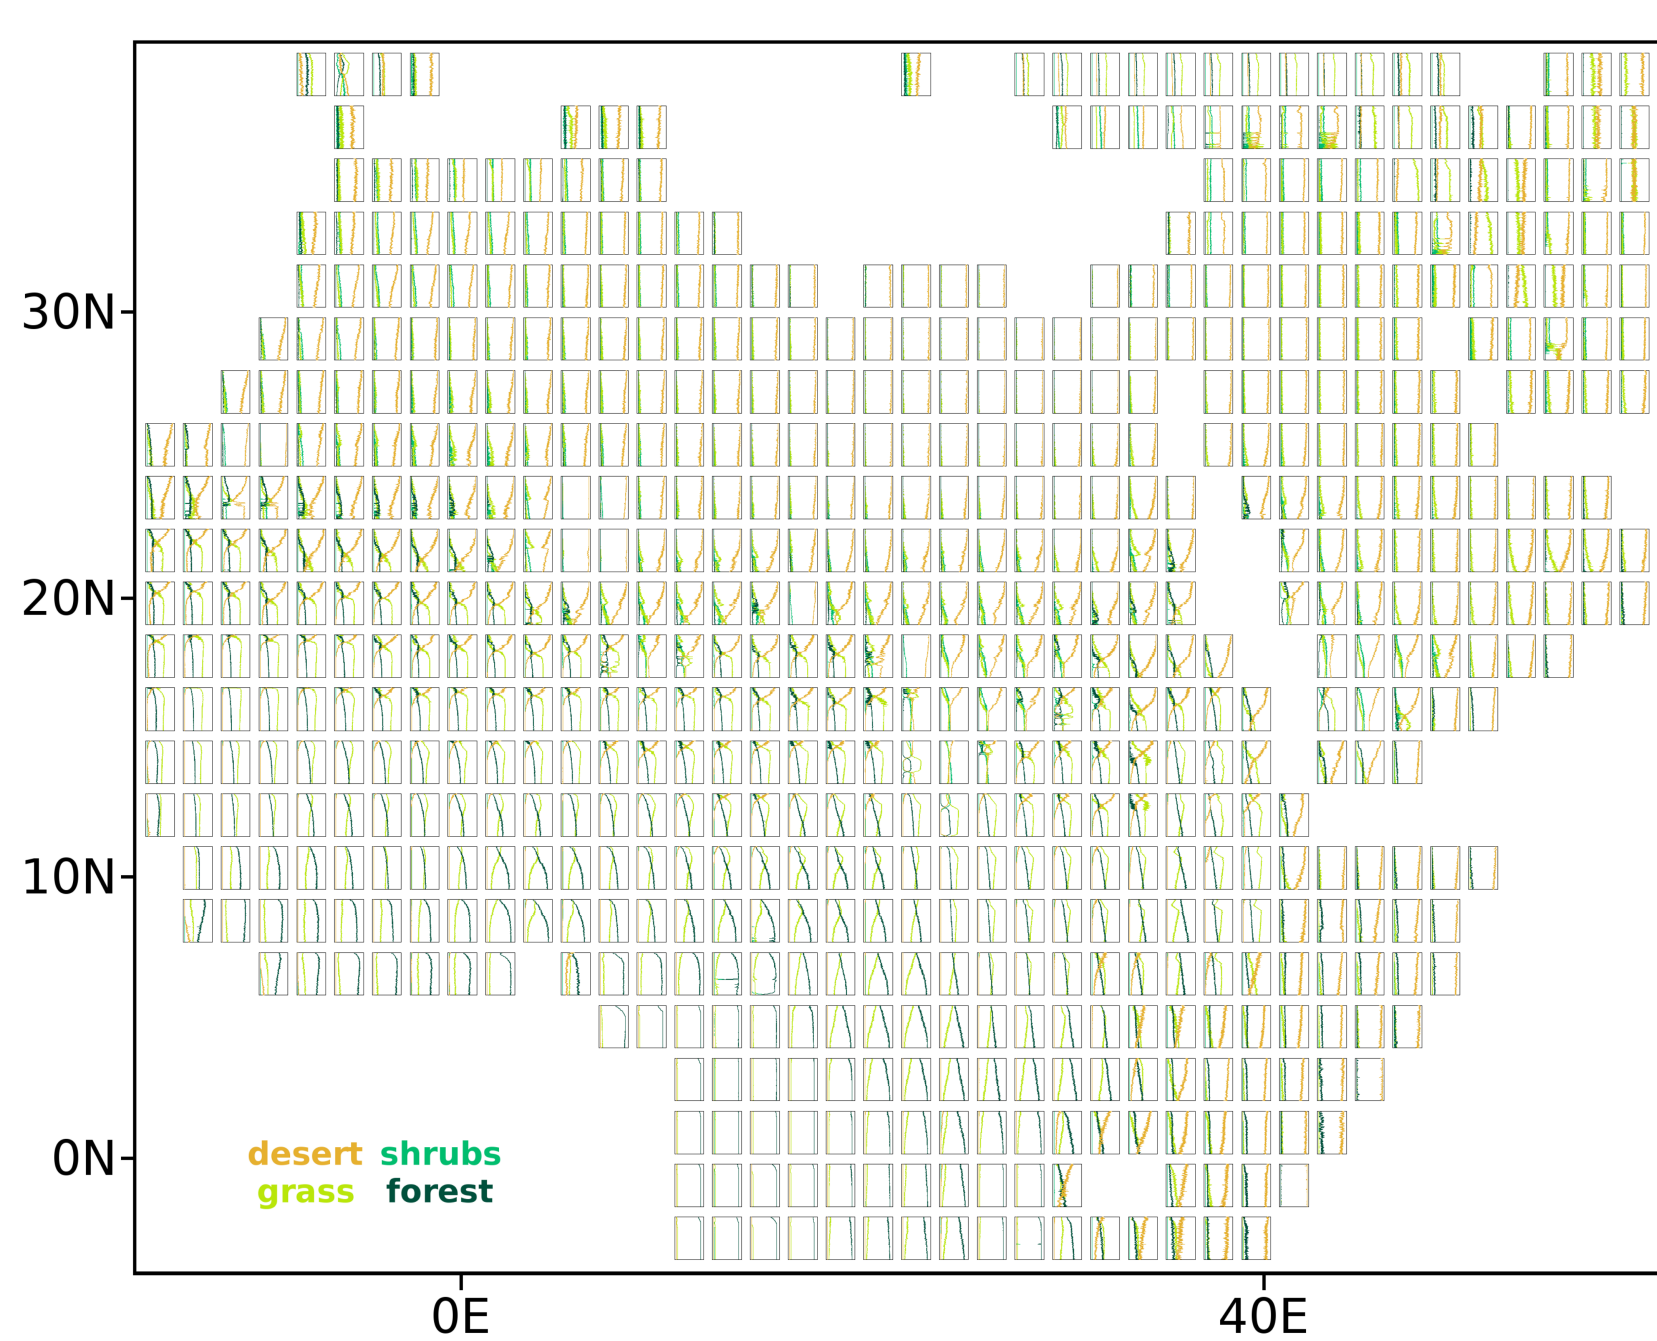

Supplement: Supplementary file 1 [file cp-16-117-2020-supplement.zip]
